# Supplementary material for: Structure-based Design of JOC-x, a Conjugatable Tumor Tight Junction Opener to Enhance Cancer Therapy
Source: PubMed Central journal article supplement (PMC6467980; doi:10.1038/s41598-019-42229-3), 2019-04-16
Supplement: 41598_2019_42229_MOESM1_ESM.pdf [file 41598_2019_42229_MOESM1_ESM.pdf]

1 **Supplementary Figures**

2

3

4 **STRUCTURE-BASED DESIGN OF JOC-X, A CONJUGATABLE TUMOR TIGHT**  
5 **JUNCTION OPENER TO ENHANCE CANCER THERAPY**

6

7 Ragan Pitner<sup>1,2+</sup>, Jiho Kim<sup>1,3+</sup>, Jenn Davis-Bergthold<sup>1</sup>, Cheri Turner<sup>1</sup>, Emilie Vassal-Stermann<sup>4</sup>,  
8 Hongjie Wang<sup>5</sup>, Jaclyn Adams<sup>5</sup>, Lauren Carter<sup>6</sup>, Jeffrey A. Ahlgren<sup>7</sup>, Pascal Fender<sup>4</sup>, André  
9 Lieber<sup>5,8</sup>, Darrick Carter<sup>1,3,5,8</sup>, and Sean A. Gray<sup>1\*</sup>

10

11 <sup>1</sup>PAI Life Sciences, Inc., Seattle, WA

12 <sup>2</sup>University of Washington, Dept. of Immunology, Seattle, WA

13 <sup>3</sup>University of Washington, Program in Pathobiology, Dept. of Global Health, Seattle, WA

14 <sup>4</sup>Institut de Biologie Structurale, UMR5075, CNRS/CEA/UGA, Grenoble, France

15 <sup>5</sup>University of Washington, Division of Medical Genetics, Seattle, WA

16 <sup>6</sup>Institute for Protein Design, Department of Biochemistry, University of Washington, Seattle, WA

17 <sup>7</sup>Wyatt Technology Corporation, Santa Barbara, CA

18 <sup>8</sup>Compliment Corp., Seattle, WA

19

20 <sup>+</sup>These authors contributed equally to this work

21 <sup>\*</sup>Correspondence and requests for materials should be addressed to SAG

22 (sean.gray@pailifesciences.com)

23

| Designation     | Schematic | V239D mutation?  | Dimerization domain? | Wild-type cysteines | Location of newly inserted cysteine?            |
|-----------------|-----------|------------------|----------------------|---------------------|-------------------------------------------------|
| JO-4            |           | Yes              | Yes                  | Yes                 | No                                              |
| GB1             |           | No               | Yes                  | Yes                 | No                                              |
| GB2             |           | No               | Yes                  | No                  | No                                              |
| GB3             |           | With and without | Yes                  | No                  | Following C-terminal G4S linker                 |
| GB4             |           | No               | Yes                  | No                  | Preceding 6x-his tag                            |
| GB5 (ADD)       |           | No               | No                   | No                  | No                                              |
| GB6             |           | No               | Yes                  | No                  | Within the H-I loop                             |
| GB7 (ADD)/JOC-x |           | With and without | No                   | No                  | Following C-terminal G4S linker                 |
| GB8 (ADD)       |           | No               | No                   | No                  | Following 6x-his tag                            |
| GB9 (ADD)       |           | No               | No                   | No                  | Within the H-I loop                             |
| GB10            |           | No               | Yes                  | No                  | Following 6x-his tag within dimerization domain |

**Supplementary Figure 1. Schematic representation of JO-derived protein constructs.** On the top is a crude representation of the affinity enhanced JO-4 protein with key features indicated below. Letters and numbers indicate locations and specific amino acids that were altered for this analysis. The affinity enhancing V239D mutation (V or D) is shown in yellow type, native cysteines (C) are shown in white type, serines introduced by mutation of native cysteines are shown as (S) in white type, and newly inserted cysteines for directed conjugation are shown as (C) in red type. Only GB3 and GB7 were constructed and analyzed with both the low affinity valine (V) and high-affinity aspartic acid (D) mutations. Key changes to each protein construct are summarized by the table to the right of the pictorial image.

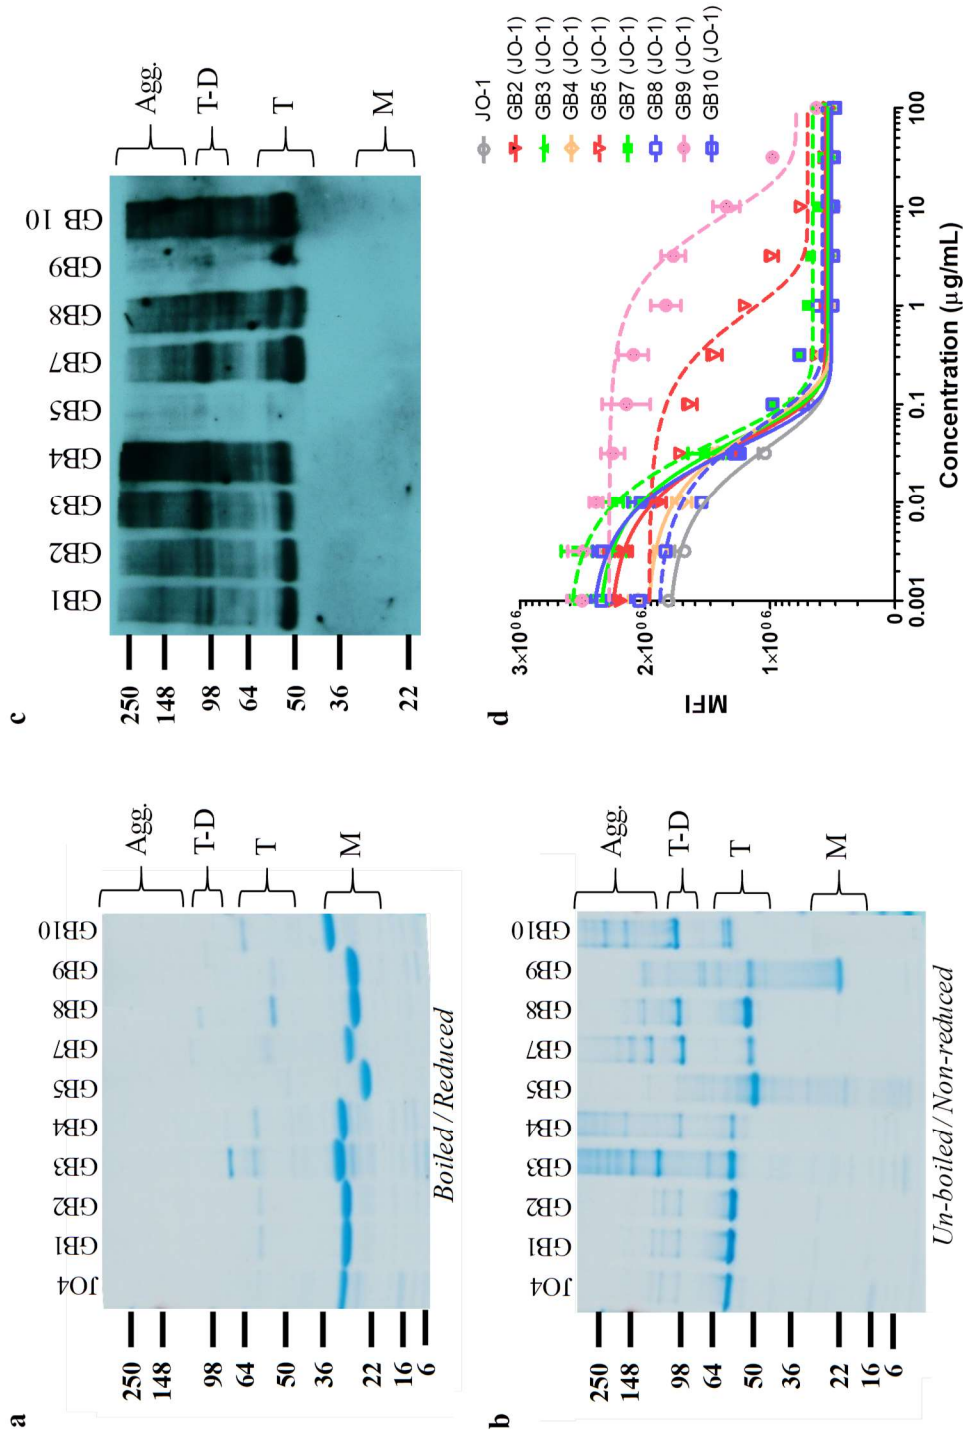

**Supplementary Figure 2. Production and characterization of JO-1 derived proteins.** Panels (a) shows the boiled and reduced analysis of the GB proteins on Coomassie stained SDS-PAGE. Panel (b) shows the non-reduced and un-boiled analysis of the same proteins. Panel (c) shows a DSG2 binding Western blot of the GB proteins. In panels a, b, and c the multimeric forms are indicated to the right of the gel/blot whereby M= monomers, T= trimers, T-D= trimer-dimers, and Agg.= aggregates/multimers. Panel (d) shows the viral inhibition curves for each protein. The  $\text{IC}_{50}$  values are shown in Table 1.

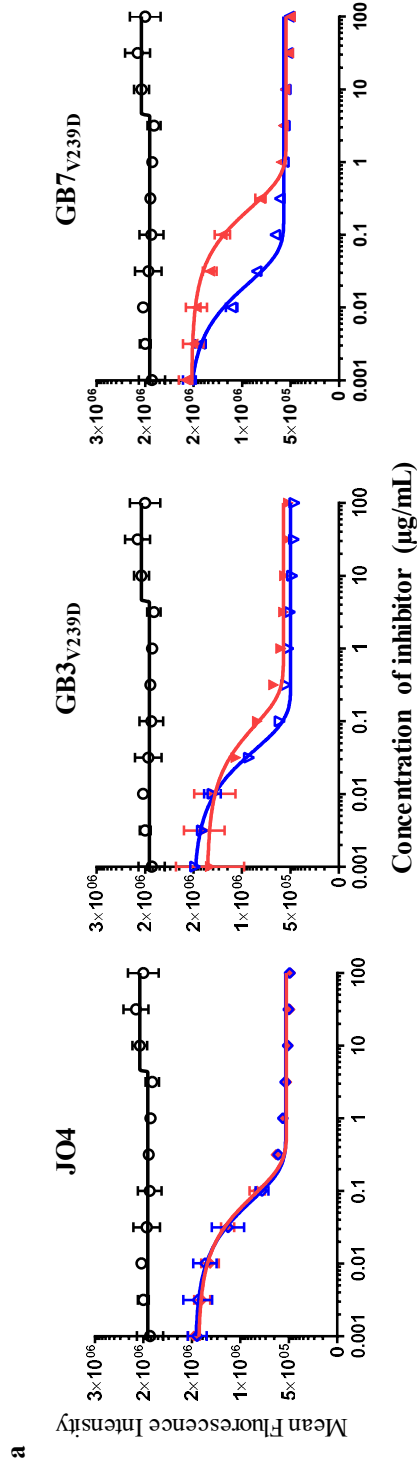

**Supplementary Figure 3. Viral inhibition mediated by reduced and non-reduced proteins.** Panel (a) shows the viral inhibition curves for reduced (red lines) and non-reduced (blue lines) JO-4, GB3<sub>V239D</sub>, and GB7<sub>V239D</sub> proteins. Black lines show the VIA curves for the BSA control. Panel (b) reports the IC<sub>50</sub> values for each of the VIA curves approximating the fold change in viral inhibition activity following reduction.
